**Mechanistic target of rapamycin complex 1 (mTORC1) activity occurs predominantly in the periphery of human skeletal muscle fibers, in close proximity to focal adhesion complexes, following anabolic stimuli**

Nathan Hodson<sup>1</sup>, Michael Mazzulla<sup>1</sup>, Dinesh Kumbhare<sup>2</sup>, Daniel R. Moore<sup>1</sup>.

<sup>1</sup>Faculty of Kinesiology and Physical Education, University of Toronto, Ontario, Canada.

<sup>2</sup>Faculty of Medicine, University of Toronto, Ontario, Canada.

**Corresponding Author:**

Daniel R. Moore, PhD

Goldring Centre for High Performance

Faculty of Kinesiology and Physical Education

University of Toronto

100 Devonshire Place

M5S 2C9

Email: [dr.moore@utoronto.ca](mailto:dr.moore@utoronto.ca)

**Running Title:** Peripheral mTORC1 activity in human skeletal muscle

**Key Words:** mTORC1, Focal adhesions, Skeletal muscle, Immunofluorescence

## 1 **Abbreviations**

|    |               |                                                                       |
|----|---------------|-----------------------------------------------------------------------|
| 2  | <b>4EBP1</b>  | Eukaryotic translation initiation factor 4E-binding protein 1         |
| 3  | <b>Akt</b>    | Protein kinase B                                                      |
| 4  | <b>ANOVA</b>  | analysis of variance                                                  |
| 5  | <b>BSA</b>    | bovine serum albumin                                                  |
| 6  | <b>Cdk5</b>   | Cyclin-dependent kinase 5                                             |
| 7  | <b>DAPI</b>   | 4',6-diamidino-2-phenylindole                                         |
| 8  | <b>EXFED</b>  | protein-carbohydrate feeding following whole-body resistance exercise |
| 9  | <b>FAK</b>    | focal adhesion kinase                                                 |
| 10 | <b>FED</b>    | protein-carbohydrate feeding alone                                    |
| 11 | <b>HEK293</b> | Human embryonic kidney 293 cells                                      |
| 12 | <b>JNK</b>    | c-Jun N-terminal kinase                                               |
| 13 | <b>MHC1</b>   | myosin heavy chain 1                                                  |
| 14 | <b>MPB</b>    | muscle protein breakdown                                              |
| 15 | <b>MPS</b>    | muscle protein synthesis                                              |
| 16 | <b>mTORC1</b> | mechanistic target of rapamycin complex 1                             |
| 17 | <b>NGS</b>    | normal goat serum                                                     |
| 18 | <b>NPB</b>    | net protein balance                                                   |
| 19 | <b>p90RSK</b> | p90 ribosomal protein S6 kinase                                       |
| 20 | <b>PBST</b>   | phosphate-buffered saline supplemented with Tween20                   |
| 21 | <b>PRE</b>    | baseline                                                              |
| 22 | <b>Rheb</b>   | ras homolog enriched in brain                                         |
| 23 | <b>RIPA</b>   | radioimmunoprecipitation assay                                        |

|    |                 |                                                |
|----|-----------------|------------------------------------------------|
| 24 | <b>RPS6</b>     | ribosomal protein S6                           |
| 25 | <b>S6K1</b>     | p70 ribosomal protein S6 kinase                |
| 26 | <b>SUnSET</b>   | surface sensing of translation                 |
| 27 | <b>TBST</b>     | tris-buffered saline supplemented with Tween20 |
| 28 | <b>TSC1/2</b>   | Tuberous sclerosis proteins 1 and 2            |
| 29 | <b>v-ATPase</b> | Vacuolar-type ATPase                           |
| 30 | <b>WGA</b>      | wheat germ agglutinin                          |

31

32

33

34

35

36

37

38

39

40

41

42

43

44

45

46

## 47 Abstract

48 Following anabolic stimuli (e.g. mechanical loading and/or amino acid provision) the  
49 mechanistic target of rapamycin complex 1 (mTORC1), a master regulator of protein synthesis,  
50 translocates toward the cell periphery. However, it is unknown if mTORC1 activity occurs prior  
51 to or following this translocation. We therefore aimed to determine the cellular location of  
52 mTORC1 activity in human skeletal muscle following anabolic stimuli. Fourteen young, healthy  
53 males either ingested a protein-carbohydrate beverage (0.25g/kg protein, 0.75g/kg carbohydrate)  
54 alone (n=7, 23±5yrs, 76.8±3.6kg, 13.6±3.8%BF, FED) or following a whole-body resistance  
55 exercise bout (n=7, 22±2yrs, 78.1±3.6kg, 12.2±4.9%BF, EXFED). *Vastus lateralis* muscle  
56 biopsies were obtained at rest (PRE) and 120 and 300min following anabolic stimuli. The spatial  
57 regulation of mTORC1 activity was assessed through immunofluorescent staining of p-  
58 RPS6<sup>Ser240/244</sup>, an mTORC1-specific phosphorylation event. p-RPS6<sup>Ser240/244</sup> measured by  
59 immunofluorescent staining or immunoblot was positively correlated (r=0.76, p<0.001).  
60 Peripheral staining intensity of p-RPS6<sup>Ser240/244</sup> increased above PRE in both FED and EXFED at  
61 120min (~54% and ~138% respectively, p<0.05) but was greater in EXFED at both post-stimuli  
62 time points (p<0.05). The peripheral-central ratio of p-RPS6<sup>240/244</sup> staining was displayed a  
63 similar pattern, suggesting mTORC1 activity occurs predominantly in the periphery of fibers.  
64 Moreover, p-RPS6<sup>Ser240/244</sup> intensity within paxillin-positive regions, a marker of focal adhesion  
65 complexes, was elevated at 120min irrespective of stimulus (p=0.006) before returning to PRE at  
66 300min. These data confirm that mTORC1 activity occurs in the region of human muscle fibers  
67 to which mTORC1 translocates following anabolic stimuli and identifies focal adhesion  
68 complexes as a potential site of mTORC1 activation in vivo.

69

70

71

72

73

74

## 75 **Introduction**

76 Skeletal muscle size is governed by net protein balance (NPB), the algebraic difference between  
77 muscle protein synthesis (MPS) and breakdown (MPB). Of these two components, MPS is the  
78 most sensitive, drastically elevating in response to anabolic stimuli such as amino acid ingestion  
79 or mechanical loading (1, 2). At the molecular level, MPS is believed to be primarily regulated  
80 by mechanistic target of rapamycin complex 1 (mTORC1), an evolutionarily conserved  
81 serine/threonine kinase, whose downstream targets are implicated in the control of translation  
82 initiation and elongation and ribosomal RNA synthesis (3). Indeed, the ingestion of rapamycin,  
83 an mTORC1 inhibitor, completely abolishes post-exercise/feeding induced elevations in MPS in  
84 humans (4, 5). Moreover, mTORC1 also inhibits MPB via the inhibition of autophagophore  
85 biogenesis and nucleation (6, 7). mTORC1 is therefore an integral regulator of NPB in skeletal  
86 muscle and as such research has focused on elucidating the mechanisms of mTORC1 activation  
87 in order to identify interventions to promote MPS and subsequent muscle growth in  
88 compromised populations (e.g. older or clinical populations).

89 Initially, the principal source of data regarding mTORC1 activation was gleaned from *in vitro*  
90 investigations utilizing HeLa and/or HEK293 cell lines (8–11). Here, the lysosome was  
91 identified as the site of mTORC1 activation due to its abundance of amino acids within its  
92 lumen, and the presence of direct mTORC1 activators, Ras homolog enriched in brain (Rheb)  
93 and phosphatidic acid, on the lysosomal membrane (12, 13). In response to amino acid provision,  
94 mTORC1 is recruited to the lysosomal membrane, from the cytosol, through an ‘inside-out’  
95 mechanism involving the vATPase-Ragulator-Rag protein axis to become active (8–10). In  
96 contrast, following growth factor administration, mTORC1 activity is enhanced through removal  
97 of tuberous sclerosis complex proteins (TSC1/2) from their association with Rheb allowing Rheb  
98 to convert to its active guanosine tri-phosphate loaded state (14). In rodent skeletal muscle,  
99 mechanical stimulation was shown to activate mTORC1 by a similar mechanism, reducing  
100 TSC1/2-Rheb colocalization and enhancing mTORC1 enrichment at the lysosomal membrane  
101 (15). Although lysosomal targeting of this kinase was originally believed to be the mechanism of  
102 mTORC1 activation in human skeletal muscle, recent investigations have not specifically  
103 supported this. For example, in human skeletal muscle amino acid ingestion, mechanical loading  
104 or a combination has little effect on mTORC1-lysosomal colocalization, which may be related to

105 upregulation of autophagy and other catabolic systems that maintain intralysosomal amino acid  
106 concentrations preserve mTORC1 localization at the lysosomal surface (16–18). Instead,  
107 anabolic stimuli initiate the translocation of mTORC1-lysosome complexes toward the cell  
108 periphery where mTORC1 becomes in close proximity to upstream activators (e.g. Akt),  
109 downstream substrates (e.g. translation initiation factors) and the vasculature (entry site of  
110 extracellular amino acids) (16–21). These findings have also been reinforced by *in vitro* evidence  
111 where the disruption of lysosomal movement impairs mTORC1 activation in response to amino  
112 acids or growth factors (18). However, although mTORC1-lysosomal translocation and  
113 mTORC1 kinase activity appear related in human skeletal muscle, it is currently unknown  
114 whether mTORC1 activity occurs prior to (i.e. in central, cytosolic regions) or following this  
115 translocation (i.e. in peripheral regions).

116 A recent *in vitro* investigation has also identified focal adhesion complexes as an important site  
117 in mTORC1 regulation. These complexes are enriched with growth factor receptors, amino acid  
118 transporters and integrins (22) suggesting they could be a site where anabolic stimuli convene to  
119 regulate mTORC1 kinase activity. Indeed, the forced targeting of mTORC1 to focal adhesion  
120 complexes elevates mTORC1 activity irrespective of lysosomal positioning (22). In skeletal  
121 muscle paxillin, a commonly used marker of focal adhesion complexes, is observed to be  
122 colocalized with the microvasculature (23), a region which mTORC1 has been seen to  
123 translocate to in response to anabolic stimuli (17) and where amino acid transporters (e.g. L-type  
124 amino acid transport) reside (24). Therefore, focal adhesion complexes may also contribute to  
125 mTORC1 activation in human skeletal muscle, however, a direct association between the two  
126 has yet to be observed.

127 The primary aim of the current investigation was to establish a method to visualize mTORC1  
128 activity in human skeletal muscle and explore the effects of anabolic stimuli on the localization  
129 of mTORC1 activity. In addition, we also aimed to determine if mTORC1 activity occurred in  
130 the vicinity of focal adhesion complexes and if mTORC1 activation was regulated in a fiber  
131 type-specific manner. To achieve this, we utilized p-RPS6<sup>Ser240/244</sup> as a marker of mTORC1  
132 activity as it is an mTORC1-specific event (25, 26) has regularly been shown to be rapamycin-  
133 sensitive in various models (5, 25, 27, 28). We hypothesized that mTORC1 activity would occur  
134 predominantly in the periphery of muscle fibers, the location to which mTORC1 is commonly

135 observed to translocate. We also hypothesized that mTORC1 activity would be enriched in focal  
136 adhesion complexes and would occur to a similar extent in oxidative and glycolytic fibers.

## 137 **Materials and Methods**

### 138 *Subjects and Ethical Approval*

139 Fourteen young, healthy, recreationally active males (age;  $23 \pm 4$  yrs, weight;  $77.5 \pm 17.6$  kg, body  
140 fat (BF);  $12.9 \pm 4.3\%$ ) volunteered to participate in the current study. All participants provided  
141 written informed consent after being informed of the procedures and risks associated with the  
142 study. Each participant completed a physical activity readiness questionnaire prior to enrollment  
143 to ensure they were healthy and able to complete resistance exercise. Exclusion criteria were: i)  
144 tobacco and/or illicit anabolic drug use (e.g. testosterone, growth hormones); ii) veganism or  
145 nut/dairy allergies and; iii) injuries preventing participation in weight lifting/resistance exercise.  
146 Participants were randomized to either consume a protein-carbohydrate beverage at rest (FED,  
147  $n=7$ ,  $23 \pm 5$  yrs,  $76.8 \pm 3.6$  kg,  $13.6 \pm 3.8\%$  BF), or following a bout of whole-body resistance exercise  
148 (EXFED,  $n=7$ ,  $22 \pm 2$  yrs,  $78.1 \pm 3.6$  kg,  $12.2 \pm 4.9\%$  BF). All procedures were approved by the  
149 research ethics board at the University of Toronto, Canada (Protocol #00036752) and conformed  
150 to the Declaration of Helsinki (revised 2013).

### 151 *Preliminary assessments*

152 Participants attended the laboratory 3-7 days prior to experimental trial days for body  
153 composition and maximal strength testing. Following an overnight ( $\sim 10$ h) fast, and prior to water  
154 consumption, participants height and weight were measured with a stadiometer and calibrated  
155 scales respectively before body composition was assessed via air displacement plethysmography  
156 (BOD-POD, COSMED USA Inc., Chicago, IL, USA). Participants were then provided with a  
157 light snack and underwent maximal strength training for the following exercises: i) dumbbell  
158 chest press, ii) dumbbell row, iii) leg extension, and; iv) leg press. This testing consisted of a  
159 warm-up set at a self-selected load, followed by progressive load increments until participants  
160 could no longer complete one repetition with correct form. The final load at which participants  
161 successfully completed a repetition was recorded as the 1 repetition maximum (1RM) and was  
162 used to calculate loads to be used during the experimental trial.

### 163 *Experimental trial*

164 On the day of the experimental trial, participants attended the laboratory following an overnight  
165 fast (~10h) and having refrained from strenuous exercise and alcohol consumption in the  
166 previous 48 hours. Participants rested in a supine position upon arrival for 10min after which a  
167 skeletal muscle biopsy sample (PRE) was obtained from the *vastus lateralis*, of a randomly  
168 selected leg, using the modified Bergström technique (29) under local anesthesia (2% lidocaine).  
169 Participants then undertook their assigned intervention, either consumption of a protein-  
170 carbohydrate beverage alone or following a whole-body resistance exercise bout. The protein-  
171 carbohydrate beverage contained crystalline amino acids in a formulation modeled on the  
172 composition of egg protein (30) and artificially flavored maltodextrin (Tang, Kraft Foods Inc.  
173 Chicago, Illinois, United States) providing 0.25 g/kg protein and 0.75g/kg carbohydrate. The  
174 whole-body resistance exercise bout consisted of 4 sets of each exercise (chest press, dumbbell  
175 row, leg press & leg extension) at 75% 1RM completed to volitional failure (~8-12 repetitions)  
176 with a 2min rest interval between each set/exercise. Immediately following exercise cessation,  
177 EXFED participants consumed the protein-carbohydrate beverage. After consumption of the  
178 beverage participants remained supine for the following 300min with subsequent skeletal muscle  
179 biopsy samples obtained at 120 and 300min from separate incisions. Muscle biopsy samples  
180 were freed from any visible blood, adipose, and connective tissue and placed in optimal cutting  
181 temperature compound (VWR International, Mississauga, ON, Canada) and frozen in liquid  
182 nitrogen-cooled isopentane before storage at  $-80^{\circ}\text{C}$  for immunofluorescence analysis. A separate  
183 piece of the muscle biopsy sample immediately frozen in liquid nitrogen and stored at  $-80^{\circ}\text{C}$   
184 until subsequent immunoblot analysis.

### 185 *Immunoblotting*

186 Immunoblotting was completed as described previously (19). Briefly, a small piece of skeletal  
187 muscle tissue (20mg) was homogenized by mechanical pulverization in  
188 radioimmunoprecipitation assay (RIPA) buffer (65 mM Tris-base, 150 mM NaCl, 1% NP-40,  
189 0.5% sodium deoxycholate, 0.1% sodium dodecyl sulfate) with added protease and phosphatase  
190 inhibitors (Roche Applied Science, Mannheim, GER). Myofibrillar proteins were pelleted by  
191 centrifugation at 700g for 5min and the protein concentration of the sarcoplasmic fraction  
192 (supernatant) was determined via a bicinchoninic acid assay (Thermo Fisher Scientific,  
193 Rockford, IL). Samples were then diluted to equal concentrations in 1X Laemmli sample buffer



194 and denatured at 95°C for 5min. Equal amounts of protein were then separated by SDS-PAGE on  
195 4-20% polyacrylamide gels (Bio-Rad Laboratories, Richmond, VA, USA) at 200V for 40min,  
196 and proteins were transferred onto nitrocellulose membranes at 100V for 1h. Membranes were  
197 then stained with Ponceau S to confirm equal loading and blocked in 5% (wt/vol) bovine serum  
198 albumin in Tris-buffered saline with 0.1% Tween 20 (TBST) for 1h at room temperature (RT).  
199 Following this, membranes were incubated in primary antibody (rpS6<sup>Ser240/244</sup> #5364, tRPS6  
200 #2217, Cell Signaling, Danvers, MA.), diluted 1:1000 in TBST, overnight at 4°C. Membranes  
201 were then washed in TBST and incubated in horseradish peroxidase-conjugated secondary  
202 antibody (1:10000 in TBST, Cell Signaling) for 1h at RT. Bands were detected with  
203 chemiluminescent substrate (WBKLS0500, Millipore, Etobicoke, ON, Canada) and visualized  
204 using a Fluorochem E Imaging system (Protein Simple; Alpha Innotech, Santa Clara, CA).  
205 Bands were quantified using Protein Simple AlphaView SA software and normalized to Ponceau  
206 S and a gel control (identical generic sample run on every gel).

#### 207 *Immunofluorescence*

208 Serial skeletal muscle cross sections (7µm) were sectioned onto room temperature uncoated  
209 glass slides (ThermoFisher SuperFrost+, Fisher Scientific, Rockford, IL) and air-dried to remove  
210 excess water. For p-RPS6<sup>Ser240/244</sup> staining, sections were fixed in 4% paraformaldehyde for  
211 10min at 4°C to create covalent cross links. Sections were then washed in 1xPBST (PBS  
212 supplemented with 0.2% Tween20) and incubated in a blocking solution consisting of 2% bovine  
213 serum albumin (BSA), 5% fetal bovine serum, 5% normal goat serum (NGS), 0.2% Triton X-100  
214 and 0.1% sodium azide for 90min at RT. Following this, sections were washed again in 1xPBST  
215 for 5min and incubated in primary antibody, diluted in 1%BSA, overnight at 4°C (antibodies and  
216 dilutions are listed in Table 1.). The next day, following further 1xPBST washes (3x5min),  
217 sections were incubated in corresponding secondary antibodies (1:300 dilution in 1%BSA in  
218 1xPBS, detail in Table 1) for 2h at RT. Sections were then either incubated in wheat germ  
219 agglutinin (WGA, 1:20 in 1%BSA), to mark the cell membrane (Myosin heavy chain 1-  
220 RPS6<sup>Ser240/244</sup> stain only), for 30min or DAPI (1:10000 in 1xPBS), to mark nuclei, for 10min and  
221 then dried and covered DAKO fluorescent mounting medium (Agilent, Santa Clara, CA) and a  
222 coverslip prior to imaging. To confirm specificity of the p-RPS6<sup>Ser240/244</sup> antibody to  
223 phosphorylated forms of the protein, a lambda protein phosphatase (LPP) assay was completed

224 (n=2, 120 & 300 time points only for each condition). Here, prior to fixation, tissue sections were  
225 incubated in a solution of LPP, NEBuffer and Manganese Chloride (MnCl<sub>2</sub>) as per  
226 manufacturer's instructions (P0753, Cell Signaling) for 2h. Following this, p-RPS6<sup>Ser240/244</sup>  
227 immunofluorescence staining was completed as described above. A duplicate tissue section on  
228 the same slide was stained as normal (i.e. no LPP incubation) to act as a comparative control. To  
229 ensure fluorescence bleed through was not affecting results during fiber type staining, a subset of  
230 samples (n=2 per condition) were stained via serial staining and co-staining methods  
231 simultaneously. For serial staining, one section was stained for Myosin heavy chain 1 (MHC1)  
232 and WGA whilst a second identical section on the same slide was stained for p-RPS6<sup>Ser240/244</sup>.  
233 The first section was then used to identify fibers on the second section and staining intensity  
234 measured, and compared to a co-stain on the same slide, in order to assess if the presence of  
235 MHC1 on the same section as p-RPS6<sup>Ser240/244</sup> affected outcomes.

236 For mTOR staining, sections were fixed in an acetone-ethanol solution (3:1 ratio) for 5min and  
237 blocked with 5%NGS for 1h at RT. Samples were then incubated in primary antibodies (Table 1)  
238 for 2h at RT, washed in 1xPBST (3x5min), and exposed to relevant secondary antibodies (1:300  
239 dilution in 1xPBS, Table 1) for 1h at RT. WGA was then used to mark the sarcolemma (1:20 in  
240 1% BSA) for 30min at RT and slides were then covered with DAKO fluorescent mounting  
241 medium and a coverslip prior to imaging.

#### 242 *Image capture and analysis*

243 Image capture was undertaken on an EVOS FL Auto Cell imaging microscope (Thermo Fisher  
244 Scientific, Waltham, MA) at 40× 0.75NA magnification, using automated image capture and  
245 stitching functions. All sections from a single participant were stained and imaged on a single  
246 slide and all image capturing parameters were kept constant for all images including exposure  
247 time, gain, and light intensity. As such, images containing approximately 100 fibers were  
248 captured for each time point, for each participant for subsequent analysis.

249 Image processing and quantification was all completed using Image J (Fiji plugin, v. 1.5,  
250 National Institutes of Health, USA). For total staining intensity analysis, mean pixel intensity  
251 was measured across the entire section. For peripheral staining intensity, mean pixel intensity in  
252 the outer 5.5µm of each skeletal muscle fiber was assessed, with the remaining region of the  
253 fiber being recorded as the 'central' region. This region was chosen as it is the region within

254 which mTORC1 is observed in following anabolic stimuli (16, 17, 20). Peripheral-central ratio  
255 was calculated as mean pixel intensity in the peripheral region divided by the mean pixel  
256 intensity in the central region. To determine fiber-type specific staining of p-RPS6<sup>Ser240/244</sup>, type I  
257 fibers were recorded as those with positive myosin heavy chain 1 staining whereas all ‘negative’  
258 fibers were recorded as type II fibers. When assessing staining intensity within paxillin-positive  
259 regions, thresholding was used to determine paxillin positive regions of the cell and regions of  
260 interest created in these areas. These areas were then transferred to p-RPS6<sup>Ser240/244</sup> channel  
261 images and mean pixel intensity was measured. Thresholding levels for paxillin were kept  
262 identical across all images for each participant. Finally, colocalization analysis was conducted by  
263 quantifying the Pearson’s correlation coefficient where each individual pixel’s intensity in each channel  
264 was plotted and the corresponding  $r$  value calculated. Therefore, increases in colocalization between two  
265 targets at a given time point would result in  $r$  values moving closer to 1.

## 266 *Statistical analysis*

267 All statistical tests were conducted in SPSS statistics version 24 for Windows (IBM, Armonk,  
268 NY, USA), with significance set at  $P < 0.05$ . Two-way repeated measures analysis of variance  
269 (ANOVA) tests with one within-subject factor (time point) and one between-subject factor  
270 (condition) were conducted for all outcome measures other than fiber-type specific RPS6<sup>Ser240/244</sup>  
271 staining intensities. For this measure, a three-way repeated measures ANOVA was conducted,  
272 with two within-subject (time and fiber type) and one between-subject (condition) factor. If a  
273 statistical test failed Mauchly’s test of sphericity, a Greenhouse-Geisser correction was used. If  
274 assumptions of normality (Shapiro-Wilk test) were violated, logarithmic transformed values  
275 were used. If a significant main or interaction effect was observed, *post hoc* t-tests were  
276 conducted, in Microsoft Excel, with a Holm-Bonferroni correction for multiple comparisons. To  
277 tests associations between outcome variables, pearson’s  $r$  correlation coefficients were calculated  
278 in GraphPad version 8.00 for Windows (GraphPad Software, San Diego, CA). All data is  
279 presented as Mean $\pm$ SD unless stated otherwise.

## 280 **Results**

### 281 *Confirmation of p-RPS6<sup>Ser240/244</sup> stain*

282 The p-RPS6<sup>Ser240/244</sup> immunofluorescent staining protocol was confirmed by the use of a LPP  
283 assay. Incubation of sections with LPP significantly reduced p-RPS6<sup>Ser240/244</sup> staining intensity  
284 confirming the specificity of the antibody to phosphorylated RPS6 ( $p < 0.001$ , Figure 1A). The  
285 stain was further confirmed via the omission of primary or secondary antibodies to determine  
286 non-specific secondary antibody staining and contribution of autofluorescence respectively.  
287 When either antibody was omitted, staining intensity was no longer apparent in muscle cross-  
288 sections imaged using identical parameters to a control stain run on the same sample (Figure 1B  
289 & 1C).

### 290 *RPS6<sup>Ser240/244</sup> phosphorylation assessed by immunoblot*

291 A time x condition interaction effect was observed for p-RPS6<sup>Ser240/244</sup> ( $p = 0.039$ ). RPS6<sup>Ser240/244</sup>  
292 phosphorylation was elevated at 120min following both FED and EXFED ( $5.3 \pm 3.1$  and  
293  $21.3 \pm 15.6$  fold, respectively;  $p < 0.05$ ), before returning to PRE at 300min (Figure 2A). The extent  
294 of RPS6<sup>Ser240/244</sup> phosphorylation in EXFED was also greater than that in FED at both 120 and  
295 300min time points ( $21.3 \pm 15.6$  vs.  $5.3 \pm 3.1$  fold and  $4.4 \pm 6.4$  vs.  $0.97 \pm 0.79$  fold, respectively;  
296  $p < 0.05$ , Figure 2A). A condition effect was found for total RPS6 protein content ( $p = 0.011$ )  
297 where, irrespective of time point, FED individuals had greater expression of total RPS6 (Figure  
298 2B). No time ( $p = 0.75$ ) or interaction ( $p = 0.403$ ) effect was apparent. When p-RPS6<sup>Ser240/244</sup> was  
299 expressed in relation to total RPS6, a time x condition effect was observed ( $p = 0.001$ ). p-  
300 RPS6<sup>Ser240/244</sup>/t-RPS6 was elevated at 120min following both FED and EXFED ( $4.5 \pm 2.0$  and  
301  $31.1 \pm 15.5$  fold, respectively;  $p < 0.01$ ), with the response in EXFED greater than FED at the time  
302 point ( $p < 0.001$ , Figure 2C). RPS6<sup>Ser240/244</sup>/t-RPS6 then returned to baseline levels in FED at 300  
303 ( $0.95 \pm 0.7$  fold,  $p > 0.05$ ) but remained above baseline and FED at the same time point in EXFED  
304 ( $8.8 \pm 11.5$  fold,  $p = 0.047$ , Figure 2C).

### 305 *p-RPS6<sup>Ser240/244</sup> total staining intensity and correlation to immunoblots*

306 Total RPS6<sup>Ser240/244</sup> phosphorylation measured by immunofluorescence staining displayed a time  
307 x condition interaction effect ( $p = 0.027$ ). p-RPS6<sup>Ser240/244</sup> staining intensity was elevated in both  
308 FED and EXFED at 120min ( $50 \pm 22\%$  and  $103 \pm 40\%$ , respectively,  $p < 0.05$ , Figure 3A), with this  
309 increase being greater in EXFED ( $p = 0.02$ ). In FED, p-RPS6<sup>Ser240/244</sup> staining intensity returned to  
310 PRE at 300min, however remained above PRE levels in EXFED ( $25 \pm 18\%$ ,  $p = 0.04$ , Figure 3A).  
311 In addition, at 300min a trend suggesting EXFED induced greater p-RPS6<sup>Ser240/244</sup> staining

312 intensity compared to FED ( $25\pm 18\%$  vs  $8\pm 13\%$ ,  $p=0.06$ ). When comparing p-RPS6<sup>Ser240/244</sup>  
313 measured by immunofluorescent staining and immunoblotting, a strong positive association was  
314 apparent ( $r=0.76$ ,  $p<0.001$ . Figure 3B).

#### 315 *Region-specific RPS6<sup>Ser240/244</sup> phosphorylation*

316 When examining RPS6<sup>Ser240/244</sup> phosphorylation in central regions of fibers a time x condition  
317 interaction effect was observed ( $p=0.035$ ). p-RPS6<sup>Ser240/244</sup> was elevated at 120min only in  
318 EXFED ( $92\pm 40\%$ ,  $p<0.01$ ) and was greater compared to FED ( $44\pm 19\%$ ) at this time point  
319 ( $p=0.026$ , Figure 4A). There was also a trend for central RPS6<sup>Ser240/244</sup> phosphorylation in FED to  
320 be greater than PRE at 120min ( $p=0.054$ , Figure 4A). No differences from PRE, or between  
321 conditions, was apparent at 300min ( $p>0.05$ ). A time x condition interaction was also observed  
322 for peripheral p-RPS6<sup>Ser240/244</sup> staining intensity ( $p=0.001$ ). Peripheral p-RPS6<sup>Ser240/244</sup> increased  
323 in both FED and EXFED at 120min ( $54\pm 23\%$  &  $137\pm 48\%$  respectively,  $p<0.05$ ), but to a greater  
324 extent in EXFED ( $p=0.003$ , Figure 4B). At 300min, peripheral RPS6<sup>Ser240/244</sup> phosphorylation  
325 remained above PRE in EXFED only ( $34\pm 26\%$ ) and was greater than FED ( $7\pm 13\%$ ) at this time  
326 point ( $p=0.033$ , Figure 4B). As RPS6<sup>Ser240/244</sup> phosphorylation was elevated in both central and  
327 peripheral regions, particularly in EXFED, peripheral-central ratio was calculated to determine if  
328 mTORC1 activity occurred to a greater extent in either region. A time x condition interaction  
329 was also apparent for this variable ( $p<0.001$ ), whereby p-RPS6<sup>Ser240/244</sup> peripheral-central ratio  
330 increased, above PRE, in both FED and EXFED at 120min ( $1.20\pm 0.05$  to  $1.28\pm 0.06$ AU in FED,  
331  $1.17\pm 0.03$  to  $1.44\pm 0.08$ AU in EXFED,  $p<0.05$ , Figure 4C). Peripheral-central ratio of  
332 RPS6<sup>Ser240/244</sup> phosphorylation remained above PRE at 300min only in EXFED ( $1.26\pm 0.08$ AU,  
333  $p=0.021$ ), and peripheral-central ratios at both 120 and 300min were greater in EXFED  
334 compared to FED ( $p<0.05$ , Figure 4C).

#### 335 *Fiber type specific RPS6<sup>Ser240/244</sup> phosphorylation*

336 When presented as total p-RPS6<sup>Ser240/244</sup> pixel intensity in type I and type II fibers, only time  
337 ( $p<0.001$ ) and fiber type effects were observed ( $p<0.001$ ). Accordingly, p-RPS6<sup>Ser240/244</sup> staining  
338 intensity was elevated at 120min compared to PRE and 300min (both  $p<0.01$ ) irrespective of  
339 condition or fiber type (Figure 5A). Furthermore, irrespective of time or condition, p-  
340 RPS6<sup>Ser240/244</sup> staining intensity was greater in type I fibers ( $33\pm 24\%$  overall, Figure 5A). When  
341 presented in relation to PRE staining intensities, only a significant time effect was apparent

342 (p<0.001) showing that, irrespective of condition or fiber type, RPS6<sup>Ser240/244</sup> phosphorylation  
343 was elevated at 120min compared to PRE and 300min (both p<0.01, Figure 5B). This suggests  
344 that after correcting for basal differences, there are no fiber type differences in RPS6<sup>Ser240/244</sup>  
345 phosphorylation in response to FED or EXFED. To confirm these differences were not a result of  
346 fluorescence bleed through between channels, fiber type specific RPS6<sup>Ser240/244</sup> staining was  
347 assessed by serial section staining and direct co-staining in n=2 subjects per condition and  
348 compared. Here, a strong positive correlation was found between methods of staining (r=0.924,  
349 p<0.001, data not shown) suggesting differences were not a result of fluorescence bleed through.

### 350 *RPS6<sup>Ser240/244</sup> phosphorylation in proximity to focal adhesion complexes*

351 p-RPS6<sup>Ser240/244</sup>-Paxillin colocalization analysis revealed a significant time (p=0.036) but not  
352 condition (p=0.787) or time x condition interaction (p=0.66) effect. Irrespective of condition, p-  
353 RPS6<sup>Ser240/244</sup>-Paxillin colocalization was greater at 120min compared to 300min (p=0.046,  
354 Figure 6A). Furthermore, there was also a trend toward RPS6<sup>Ser240/244</sup>-Paxillin colocalization  
355 being greater at 120min, compared to PRE, irrespective of condition (p=0.051, Figure 6A). p-  
356 RPS6<sup>Ser240/244</sup> association with focal adhesion complexes was also assessed via the measurement  
357 of p-RPS6<sup>Ser240/244</sup> staining intensity with paxillin 'positive' regions. A significant effect of time  
358 (p=0.001) showed significantly greater RPS6<sup>Ser240/244</sup> phosphorylation within these regions at  
359 120min (FED – 45±34%, EXFED – 91±54%) compared to both PRE and 300min (both p<0.01,  
360 Figure 6B). In addition, a trend toward a condition effect (p<0.074) was found suggesting that,  
361 irrespective of time point, p-RPS6<sup>Ser240/244</sup> staining intensity in paxillin 'positive' regions was  
362 greater in EXFED compared to FED (Figure 6B).

### 363 *Confirmation of mTORC1 translocation to cell periphery*

364 In order to confirm mTORC1 translocation, both dystrophin and WGA were used as markers of  
365 the cell periphery. A condition effect was observed for mTOR-WGA colocalization (p=0.004)  
366 displaying that, irrespective of time point, this measure was greater in EXFED compared to FED  
367 (Figure 7A). A similar effect of condition was also noted for mTOR-dystrophin colocalization  
368 (p=0.02) where it was greater in EXFED compared to FED, irrespective of time point (Figure  
369 7B). mTOR-WGA and mTOR-dystrophin colocalization were then compared to assess  
370 agreeability between the two measures. A strong, positive correlation between the two measures  
371 was observed (r=0.77, p<0.001, Figure 7C), suggesting both WGA and dystrophin are reliable



372 markers of the cell periphery to assess mTORC1 translocation. Finally, mTOR peripheral-central  
373 ratio was assessed as a further measure of mTOR peripheral content. A time x condition  
374 interaction effect was observed ( $p=0.015$ ), with mTOR peripheral-central ratio increasing above  
375 PRE at 120 and 300 in EXFED (PRE –  $1.16\pm 0.03$  AU, 120 –  $1.24\pm 0.05$  AU, 300 –  $1.23\pm 0.04$  AU,  
376  $p<0.05$ , Figure 7D). In FED, the only difference apparent was a greater mTOR peripheral-central  
377 ratio at 120min compared to 300min ( $1.26\pm 0.06$  AU vs.  $1.20\pm 0.07$ ,  $p=0.016$ , Figure 7 D). No  
378 differences between FED and EXFED at any time point was apparent ( $p>0.05$ ).

## 379 Discussion

380 Herein, we provide a novel method for the visualization of a marker of mTORC1 activity in  
381 human skeletal muscle. Using this method, we show, for the first time, that mTORC1 activity  
382 occurs predominantly in the periphery of human skeletal muscle fibers following anabolic  
383 stimuli and to a greater extent following EXFED compared to FED. In addition, when  
384 accounting for basal differences, anabolic stimuli do not regulate RPS6<sup>Ser240/244</sup> phosphorylation  
385 in a fiber type-specific manner over the time period measured. In agreement with recent *in vitro*  
386 data (22), p-RPS6<sup>Ser240/244</sup> was observed to localize with focal adhesion complexes, purported to  
387 be central regulators of anabolic signal transduction.

388 RPS6<sup>Ser240/244</sup> phosphorylation, when measured by immunoblot, is elevated upwards of 5-fold  
389 following anabolic stimuli (5, 19, 31, 32), with these elevations often greater than other  
390 commonly assessed mTORC1-regulated sites such as p-S6K1<sup>Thr389</sup> and p-4EBP1<sup>Thr37/46</sup> (33).  
391 Furthermore, RPS6<sup>Ser240/244</sup> phosphorylation has consistently been shown to be rapamycin-  
392 sensitive *in vitro* (25, 26) and in rodent and human skeletal muscle (5, 27, 28). In raptor-KO  
393 mice, which exhibit impaired mTORC1 complex formation and kinase activity, RPS6<sup>Ser240/244</sup>  
394 phosphorylation following maximal intensity contractions was reduced by approximately 83%  
395 (34). Importantly, in raptor-KO animals, approximately 10% of raptor protein remained, which  
396 may account for the absence of fully ablated RPS6<sup>Ser240/244</sup> phosphorylation. As such, it is  
397 apparent that RPS6<sup>Ser240/244</sup> phosphorylation is almost entirely mTORC1-dependent. Another  
398 commonly measured phosphorylation site on RPS6 (serine 235/236) is not rapamycin-sensitive  
399 in all models (25–27), most likely due to the ability of p90 ribosomal S6 kinase (p90RSK) to  
400 phosphorylate this site in addition to S6K1 (26). Collectively, these data show that RPS6<sup>Ser240/244</sup>  
401 is a mTORC1-specific phosphorylation event that is robustly increased following anabolic

402 stimuli in skeletal muscle and thus an ideal candidate to translate from immunoblot to  
403 immunofluorescent staining methods. The p-RPS6<sup>Ser240/244</sup> stain developed here was first  
404 confirmed using a LPP assay which removes all phosphate from proteins within a tissue section.  
405 In the presence of LPP, p-RPS6<sup>Ser240/244</sup> staining intensity was greatly reduced to levels similar to  
406 those observed on unstained skeletal muscle sections at the FITC wavelength (488nm). These  
407 data confirm that the antibody utilized for this stain is specific to phosphorylated forms of  
408 protein. We then further confirmed the staining pattern via primary and secondary antibody  
409 omission stains which confirmed that neither autofluorescence nor non-specific secondary  
410 antibody staining contributed extensively to the staining pattern observed. Although these control  
411 measures can definitively confirm staining specificity to and epitope on RPS6 (35), we interpret  
412 the strong, positive correlation found between p-RPS6<sup>Ser240/244</sup> measured by immunoblot or  
413 immunofluorescent staining ( $r=0.76$ , Figure 2C) as supportive of our stain being a reliable  
414 readout of this phosphorylation event and therefore mTORC1 activity.

415 Using this newly developed immunofluorescent staining protocol, we observed that total  
416 RPS6<sup>Ser240/244</sup> staining intensity was elevated in both FED and EXFED conditions at 120 min,  
417 however the increase in EXFED was greater. This finding is in agreement with a multitude of  
418 previous papers demonstrating that several readouts of mTORC1 activity are elevated by amino  
419 acid/protein ingestion but are greater and/or more prolonged after a bout of resistance exercise,  
420 highlighting mTORC1 activity is greater than with either anabolic stimulus alone (20, 36–38).  
421 We then aimed to determine the spatial localization of mTORC1 activity. Seminal *in vitro*  
422 research identified a mechanism of mTORC1 activation centering on the lysosome where, in  
423 response to amino acid and growth factor exposure, mTORC1 translocates to the lysosomal  
424 surface and is in close vicinity to direct activators such as Rheb and phosphatidic acid (8, 10,  
425 39). However, we and others (16–18, 20, 21, 40) have observed a different mechanism where  
426 mTORC1 does not dissociate from the lysosomal membrane during fasting/nutrient deprivation  
427 and therefore mTORC1-lysosomal colocalization is not elevated in response to anabolic stimuli.  
428 Instead, following nutrient ingestion or mechanical loading, mTORC1-lysosome complexes  
429 translocate toward the periphery of the cell and colocalize with upstream activators (e.g. Akt and  
430 Rheb) and downstream substrates (e.g. translation initiation factors) (17, 18, 40). Although this  
431 new mechanism has been observed in several different investigations in human skeletal muscle  
432 (17, 20, 21, 40), it has yet to be confirmed if this translocation culminates in mTORC1



433 activation. Here, we show that RPS6<sup>Ser240/244</sup> phosphorylation occurred in peripheral regions  
434 following both anabolic stimuli and in central regions of fibers following EXFED only at 120  
435 min. Interestingly, the peripheral-central ratio was also elevated in both FED and EXFED  
436 suggesting mTORC1 activity increased to a greater extent in peripheral regions. This suggests  
437 that mTORC1 activation is occurring mainly in the regions where mTORC1 translocates to post-  
438 exercise/feeding, confirming it is most likely following/as a result of such translocation events.  
439 This has also been reported in *in vitro* investigations that the inhibition of lysosomal movement,  
440 via ablation of kinesin factors, impairs mTORC1 activation in response to nutrients (18).  
441 Importantly, the synergistic effect of EXFED was apparent for RPS6<sup>Ser240/244</sup> peripheral-central  
442 ratio as this measure was greater in EXFED compared to FED at both 120 and 300 min  
443 timepoints. Although unexpected, an increase in central mTORC1 activity, in response to  
444 nutrients, has been observed *in vitro* (22). Intramyofibrillar ribosomes have also been identified  
445 in rat skeletal muscle, albeit at approximately 75-90% lower expression to subsarcolemmal,  
446 peripheral ribosomes (41) and, assuming similar ribosome localization in human muscle, it is  
447 therefore possible that mTORC1 activity also occurred in these regions following EXFED in  
448 order to stimulate myofibrillar protein turnover. Measures of mTOR translocation were also  
449 greater following this anabolic stimuli, confirming this event had also occurred in our current  
450 model, similar to our lab's previous research (17, 20, 21, 40). Based on previous confirmatory  
451 data from our group (21) we take translocation of mTOR protein, in response to acute anabolic  
452 stimuli, as a measure of mTORC1 movement as we previously observed alterations only in  
453 Raptor cellular location in human skeletal muscle. These data therefore improve our current  
454 knowledge of mTORC1 activation in human skeletal muscle by confirming the notion that  
455 translocation of this kinase complex occurs prior to mTORC1 activation.

456 To our knowledge, this is the first study that has investigated the localization of mTORC1  
457 activity in human skeletal muscle. However, several studies in rodent (42, 43) and human  
458 skeletal muscle (36, 44) have explored readouts of mTORC1 activity by immunofluorescent  
459 staining. In human skeletal muscle, protein-carbohydrate ingestion following resistance exercise  
460 elevated p-RPS6<sup>Ser235/236</sup> staining intensity to a greater extent than carbohydrate ingestion alone  
461 post-exercise (36). Furthermore, a single night of wheel running (with 60% braking resistance)  
462 was able to significantly elevate RPS6<sup>Ser235/236</sup> staining intensity in rodents (43). Importantly,  
463 although this phosphorylation event is not completely mTORC1-specific (25–27), the peripheral

464 staining patterns observed in these studies were similar to that which we observed in the current  
465 study, although they were not quantified in previous work (36, 43). This staining pattern has  
466 also been observed in rodent skeletal muscle when assessing the same phosphorylation site as we  
467 probed here (42), however again regional-specific phosphorylation was not quantified. These  
468 data therefore add further credence to the notion that mTORC1 activity predominantly occurs in  
469 the periphery of skeletal muscle fibers. Additional evidence of this is also shown by the  
470 identification of the cell periphery in skeletal muscle as the main site of ribosomes (41), the  
471 organelles which drive protein synthesis, as well as the visualization of a strong puromycin  
472 (protein synthetic marker in SUnSET technique) signal close to the plasma membrane in rodent  
473 skeletal muscle fibers (45). The importance of the location of translation has been further  
474 explored recently in cardiac muscle, displaying that microtubules are integral to the hypertrophic  
475 response through the distribution of mRNA and ribosomes to the cell periphery (46). When  
476 these microtubules were disrupted, protein synthesis was observed to occur primarily in central  
477 regions and, even though occurring at ‘normal’ rates, was not able to initiate cardiac growth  
478 (46). This suggests that not only is cell periphery the primary location of protein synthesis,  
479 including for myofibrillar proteins (47), this process has to occur in this cellular location for  
480 optimal cell growth. Accordingly, our visualization of RPS6<sup>Ser240/244</sup> phosphorylation in  
481 peripheral regions of human skeletal muscle extends these observations and further highlights the  
482 importance of spatial mTORC1 regulation.

483 In human skeletal muscle, one previous investigation has studied the cellular localization of a  
484 phosphorylated form of S6K1 (44), the upstream kinase of RPS6. The site/s probed in this  
485 particular study, threonine 421/serine 424, are not mTORC1-regulated sites as they are regulated  
486 by cyclin-dependent kinase 5 (Cdk5) (48) or c-Jun NH2-terminal kinase (JNK) (49), which  
487 means they are less associated with S6K1 kinase activity compared the mTORC1-specific site  
488 S6K1<sup>Thr389</sup> (50). Nevertheless, this investigation provides information of the spatial regulation of  
489 this upstream kinase of RPS6. Here, in basal, fasted skeletal muscle, p-S6K1<sup>Thr421/Ser424</sup> was  
490 found to be localized in the nuclei of skeletal muscle fibers (44), an observation we did not note  
491 in the current study (data not shown). Intriguingly, in response to an acute bout of resistance  
492 exercise, the authors observed an elevation in S6K1<sup>Thr421/Ser424</sup> phosphorylation predominantly in  
493 type II fibers suggesting glycolytic fibers may respond to anabolic stimuli to a greater extent  
494 (44). However, a recent investigation demonstrated that S6K1<sup>Thr389</sup> phosphorylation occurs to a

495 greater extent in isolated type I fibers following resistance exercise and essential amino acid  
496 ingestion, particularly when presented in relation to total S6K1 protein content (51). Moreover,  
497 the phosphorylation site investigated in the current study, p-RPS6<sup>Ser240/244</sup>, increased to the  
498 greatest extent in type I fibers, in rodent skeletal muscle, following synergistic ablation (42).  
499 The findings presented herein somewhat agree with those reported by Goodman et al. (42)  
500 where p-RPS6<sup>Ser240/244</sup> was greater in type I fibers irrespective of time point or condition. This  
501 group also recently reported elevated RPS6<sup>Ser240/244</sup> phosphorylation to be greater in non-type  
502 IIB skeletal muscle fibers, compared to type IIB fibers, in mice undergoing denervation-induced  
503 atrophy. In opposition these studies however, when RPS6<sup>Ser240/244</sup> phosphorylation was expressed  
504 in relation to PRE values, we did not observe an effect of fiber type on this outcome measure.  
505 This would suggest that RPS6<sup>Ser240/244</sup> phosphorylation, and in principal mTORC1 activity, is  
506 perpetually greater in type I, oxidative fibers yet responds to anabolic stimuli to a similar extent  
507 in all fibers in human skeletal muscle. This elevated mTORC1 activity in oxidative fibers may  
508 contribute to the slightly greater protein synthesis rates observed in type I fibers during exercise  
509 recovery (52) and type I fiber-dominant muscles at rest and in response to exogenous amino  
510 acids (53).

511 Focal adhesion complexes are large, multi-protein structures which span the plasma membrane  
512 of cells in order to connect the cytoskeleton to the extracellular matrix (54) and, due to their  
513 association with costameres, transmit extracellular force to the intracellular contractile apparatus  
514 (55). Focal adhesion complexes also contain integrins and focal adhesion kinase (FAK) which  
515 can translate extracellular forces into intracellular signaling cascades to initiate cellular  
516 adaptation (56). In addition to their role in mechanotransduction, a recent *in vitro* investigation  
517 has implicated focal adhesion complexes in the activation of mTORC1 in response to amino  
518 acids and growth factors. For example, after exposure to these anabolic agents mTORC1 activity  
519 in Hela cells was seen to localize with paxillin (22), a marker of focal adhesion complexes (23,  
520 57). Moreover, disruption of focal adhesion complexes by knockout of integral proteins or via  
521 pharmacological agents, mTORC1 could no longer be activated by growth factors or amino acids  
522 (22). Our results are consistent with an integral role for focal adhesion complexes in mTORC1  
523 activity in human muscle as colocalization of RPS6<sup>Ser240/244</sup> and Paxillin and the intensity of  
524 RPS6<sup>Ser240/244</sup> staining within paxillin-positive regions were elevated at 120 min in both FED and  
525 EXFED before returning to baseline at 300 min. These two measures were conducted as

526 colocalization calculations may be affected by changes in staining/pixel intensity across the time  
527 course, which occurs when assessing phosphorylation. Therefore, the measurement of  
528 RPS6<sup>Ser240/244</sup> staining intensity within paxillin-positive regions adds further evidence of localized  
529 mTORC1 activity, confirming the colocalization data. Although trending to be greater in  
530 EXFED, the increased mTORC1 activity at focal adhesion complexes in FED as well suggests  
531 the presence of more than mechanotransduction-related signaling events in these areas. This  
532 would align with observations by Rabanal-Ruiz et al. (22) that several growth factor receptors  
533 and amino acid transporters were found to be localized within focal adhesion complexes, which  
534 have both been previously shown to contribute to mTORC1 activation. In human skeletal  
535 muscle, paxillin has also been seen to colocalize with the microvasculature (23), a location we  
536 have observed mTORC1 to translocate to following anabolic stimuli (17). Collectively, these  
537 previous data combined with our observations of localized p-RPS6<sup>Ser240/244</sup> at focal adhesion  
538 complexes highlight the importance of such complexes to mTORC1 activity and cell anabolism.  
539 Interestingly, investigations in several other cell types have found dysregulated focal adhesion  
540 protein expression or localization with ageing (58, 59). Future research in older human skeletal  
541 muscle should focus on the regulation of focal adhesion complexes to understand if this  
542 contributes to the reduced ability to activate mTORC1 in this population (60, 61).

543 In summary, we report that RPS6<sup>Ser240/244</sup> phosphorylation, a marker of mTORC1 activity, occurs  
544 predominantly in peripheral regions of human skeletal muscle fibers following anabolic stimuli.  
545 This extends our knowledge regarding the spatial regulation of mTORC1 and its contribution to  
546 mTORC1 activation in this tissue. In addition, we also show RPS6<sup>Ser240/244</sup> phosphorylation is  
547 greater in type I fibers at all time points but responds to anabolic stimuli similarly in all fiber  
548 types. Finally, p-RPS6<sup>Ser240/244</sup> is observed in close proximity to focal adhesion complexes,  
549 structures which contribute to mechanotransduction, growth-factor signaling and amino acid  
550 transport. These findings confirm *in vitro* data identifying focal adhesion complexes as integral  
551 contributors to mTORC1 activation and shows the preservation of this mechanism in human  
552 skeletal muscle. Future research should further focus on focal adhesion regulation to understand  
553 how these complexes may contribute to skeletal muscle dysfunction in populations who  
554 experience an inability respond to anabolic stimuli.

## 555 **Acknowledgements**

556 The authors would like to thank Carolyn Adams, Maksym Holowaty and Hugo Fung for their  
557 assistance during data collection. The Myosin Heavy Chain 1 antibody (A4.951) developed by  
558 Dr H. Blau were obtained from the Developmental Studies Hybridoma Bank, created by the  
559 NICHD of the NIH and maintained at The University of Iowa, Department of Biology, Iowa  
560 City, IA 52242. N. Hodson is supported by a Mitacs Accelerate Postdoctoral Fellowship  
561 (IT15730). M. Mazzulla is supported by the Ontario Graduate Scholarship (OGS) program.  
562 Research was supported by a Natural Sciences and Engineering Research Council Discovery  
563 Grant (RGPIN-2015-04251) to D.R. Moore.

#### 564 **Conflicts of Interest**

565 The authors declare no conflicts of interest.

#### 566 **Author Contributions**

567 N. Hodson, M. Mazzulla and D.R. Moore conceived and designed research. N. Hodson and M.  
568 Mazzulla collected tissue. N. Hodson completed experimental and statistical analysis. N. Hodson  
569 and D.R. Moore interpreted results. D. Kumbhare provided medical oversight. N. Hodson drafted  
570 the manuscript. All authors edited and revised manuscript. All authors approved final version of  
571 manuscript.

#### 572 **References**

- 573 1. Biolo, G., Maggi, S. P., Williams, B. D., Tipton, K. D., and Wolfe, R. R. (1995) Increased  
574 rates of muscle protein turnover and amino acid transport after resistance exercise in  
575 humans. *Am. J. Physiol.* **268**, E514-20
- 576 2. Moore, D. R., Robinson, M. J., Fry, J. L., Tang, J. E., Glover, E. I., Wilkinson, S. B.,  
577 Prior, T., Tarnopolsky, M. A., and Phillips, S. M. (2009) Ingested protein dose response of  
578 muscle and albumin protein synthesis after resistance exercise in young men. *Am J Clin*  
579 *Nutr* **89**, 161–168
- 580 3. Hay, N. and Sonenberg, N. (2004) Upstream and downstream of mTOR. *Genes Dev* **18**,  
581 1926–1945
- 582 4. Dickinson, J. M., Fry, C. S., Drummond, M. J., Gundersmann, D. M., Walker, D. K.,  
583 Glynn, E. L., Timmerman, K. L., Dhanani, S., Volpi, E., and Rasmussen, B. B. (2011)  
584 Mammalian target of rapamycin complex 1 activation is required for the stimulation of  
585 human skeletal muscle protein synthesis by essential amino acids. *J Nutr* **141**, 856–862
- 586 5. Drummond, M. J., Fry, C. S., Glynn, E. L., Dreyer, H. C., Dhanani, S., Timmerman, K.  
587 L., Volpi, E., and Rasmussen, B. B. (2009) Rapamycin administration in humans blocks  
588 the contraction-induced increase in skeletal muscle protein synthesis. *J Physiol* **587**,  
589 1535–1546

- 590 6. Egan, D., Kim, J., Shaw, R. J., and Guan, K. L. (2011) The autophagy initiating kinase  
591 ULK1 is regulated via opposing phosphorylation by AMPK and mTOR. *Autophagy* **7**,  
592 643–644
- 593 7. Yuan, H. X., Russell, R. C., and Guan, K. L. (2013) Regulation of PIK3C3/VPS34  
594 complexes by MTOR in nutrient stress-induced autophagy. *Autophagy* **9**, 1983–1995
- 595 8. Zoncu, R., Bar-Peled, L., Efeyan, A., Wang, S., Sancak, Y., and Sabatini, D. M. (2011)  
596 mTORC1 senses lysosomal amino acids through an inside-out mechanism that requires  
597 the vacuolar H(+)-ATPase. *Science (80-. )*. **334**, 678–683
- 598 9. Sancak, Y., Bar-Peled, L., Zoncu, R., Markhard, A. L., Nada, S., and Sabatini, D. M.  
599 (2010) Ragulator-Rag complex targets mTORC1 to the lysosomal surface and is necessary  
600 for its activation by amino acids. *Cell* **141**, 290–303
- 601 10. Sancak, Y., Peterson, T. R., Shaul, Y. D., Lindquist, R. A., Thoreen, C. C., Bar-Peled, L.,  
602 and Sabatini, D. M. (2008) The Rag GTPases bind raptor and mediate amino acid  
603 signaling to mTORC1. *Science (80-. )*. **320**, 1496–1501
- 604 11. Bar-Peled, L., Schweitzer, L. D., Zoncu, R., and Sabatini, D. M. (2012) Ragulator is a  
605 GEF for the rag GTPases that signal amino acid levels to mTORC1. *Cell* **150**, 1196–1208
- 606 12. Long, X., Lin, Y., Ortiz-Vega, S., Yonezawa, K., and Avruch, J. (2005) Rheb binds and  
607 regulates the mTOR kinase. *Curr Biol* **15**, 702–713
- 608 13. Yoon, M. S., Sun, Y., Arauz, E., Jiang, Y., and Chen, J. (2011) Phosphatidic acid activates  
609 mammalian target of rapamycin complex 1 (mTORC1) kinase by displacing FK506  
610 binding protein 38 (FKBP38) and exerting an allosteric effect. *J Biol Chem* **286**, 29568–  
611 29574
- 612 14. Zhang, Y., Gao, X., Saucedo, L. J., Ru, B., Edgar, B. A., and Pan, D. (2003) Rheb is a  
613 direct target of the tuberous sclerosis tumour suppressor proteins. *Nat Cell Biol* **5**, 578–  
614 581
- 615 15. Jacobs, B. L., You, J. S., Frey, J. W., Goodman, C. A., Gundermann, D. M., and  
616 Hornberger, T. A. (2013) Eccentric contractions increase the phosphorylation of tuberous  
617 sclerosis complex-2 (TSC2) and alter the targeting of TSC2 and the mechanistic target of  
618 rapamycin to the lysosome. *J Physiol* **591**, 4611–4620
- 619 16. Hodson, N. and Philp, A. (2019) The Importance of mTOR Trafficking for Human  
620 Skeletal Muscle Translational Control. *Exerc. Sport Sci. Rev.* **47**
- 621 17. Song, Z., Moore, D. R., Hodson, N., Ward, C., Dent, J. R., O’Leary, M. F., Shaw, A. M.,  
622 Hamilton, D. L., Sarkar, S., Gangloff, Y.-G., Hornberger, T. A., Spriet, L. L.,  
623 Heigenhauser, G. J., and Philp, A. (2017) Resistance exercise initiates mechanistic target  
624 of rapamycin (mTOR) translocation and protein complex co-localisation in human skeletal  
625 muscle. *Sci. Rep.* **7**, 5028
- 626 18. Korolchuk, V. I., Saiki, S., Lichtenberg, M., Siddiqi, F. H., Roberts, E. A., Imarisio, S.,  
627 Jahreiss, L., Sarkar, S., Futter, M., Menzies, F. M., O’Kane, C. J., Deretic, V., and  
628 Rubinsztein, D. C. (2011) Lysosomal positioning coordinates cellular nutrient responses.  
629 *Nat Cell Biol* **13**, 453–460
- 630 19. Hannaian, S. J., Hodson, N., Abou Sawan, S., Mazzulla, M., Kato, H., Matsunaga, K.,  
631 Waskiw-Ford, M., Duncan, J., Kumbhare, D. A., and Moore, D. R. (2020) Leucine-  
632 enriched amino acids maintain peripheral mTOR-Rheb localization independent of  
633 myofibrillar protein synthesis and mTORC1 signaling post-exercise. *J. Appl. Physiol.*
- 634 20. Hodson, N., McGlory, C., Oikawa, S. Y., Jeromson, S., Song, Z., Ruedg, M. A.,  
635 Hamilton, D. L., Phillips, S. M., and Philp, A. (2017) Differential localization and



- 636 anabolic responsiveness of mTOR complexes in human skeletal muscle in response to  
637 feeding and exercise. *Am J Physiol Cell Physiol* **313**, C604-c611
- 638 21. Hodson, N., Dent, J. R., Song, Z., O’Leary, M. F., Nicholson, T., Jones, S. W., Murray, J.  
639 T., Jeromson, S., Hamilton, D. L., Breen, L., and Philp, A. (2020) Protein-carbohydrate  
640 ingestion alters Vps34 cellular localization independent of changes in kinase activity in  
641 human skeletal muscle. *Exp. Physiol.* **105**, 2178–2189
- 642 22. Rabanal-Ruiz, Y., Byron, A., Wirth, A., Madsen, R., Sedlackova, L., Hewitt, G., Nelson,  
643 G., Stingele, J., Wills, J. C., Zhang, T., Zeug, A., Fässler, R., Vanhaesebroeck, B.,  
644 Maddocks, O. D. K., Ponimaskin, E., Carroll, B., and Korolchuk, V. I. (2021) mTORC1  
645 activity is supported by spatial association with focal adhesions. *J. Cell Biol.* **220**
- 646 23. Wilson, O. J., Bradley, H., Shaw, C. S., and Wagenmakers, A. J. (2014) Paxillin and focal  
647 adhesion kinase colocalise in human skeletal muscle and its associated microvasculature.  
648 *Histochem Cell Biol* **142**, 245–256
- 649 24. Hodson, N., Brown, T., Joannis, S., Aguirre, N., West, D. W. D., Moore, D. R., Baar, K.,  
650 Breen, L., and Philp, A. (2017) Characterisation of L-Type Amino Acid Transporter 1  
651 (LAT1) Expression in Human Skeletal Muscle by Immunofluorescent Microscopy.  
652 *Nutrients* **10**
- 653 25. Pende, M., Um, S. H., Mieulet, V., Sticker, M., Goss, V. L., Mestan, J., Mueller, M.,  
654 Fumagalli, S., Kozma, S. C., and Thomas, G. (2004) S6K1(-)/S6K2(-) mice exhibit  
655 perinatal lethality and rapamycin-sensitive 5’-terminal oligopyrimidine mRNA translation  
656 and reveal a mitogen-activated protein kinase-dependent S6 kinase pathway. *Mol. Cell.*  
657 *Biol.* **24**, 3112–3124
- 658 26. Roux, P. P., Shahbazian, D., Vu, H., Holz, M. K., Cohen, M. S., Taunton, J., Sonenberg,  
659 N., and Blenis, J. (2007) RAS/ERK signaling promotes site-specific ribosomal protein S6  
660 phosphorylation via RSK and stimulates cap-dependent translation. *J. Biol. Chem.* **282**,  
661 14056–14064
- 662 27. West, D. W., Baehr, L. M., Marcotte, G. R., Chason, C. M., Tolento, L., Gomes, A. V.,  
663 Bodine, S. C., and Baar, K. (2016) Acute resistance exercise activates rapamycin-sensitive  
664 and -insensitive mechanisms that control translational activity and capacity in skeletal  
665 muscle. *J Physiol* **594**, 453–468
- 666 28. Ogasawara, R. and Sugihara, T. (2018) Rapamycin-insensitive mechanistic target of  
667 rapamycin regulates basal and resistance exercise-induced muscle protein synthesis.  
668 *FASEB J. Off. Publ. Fed. Am. Soc. Exp. Biol.* fj201701422R
- 669 29. Tarnopolsky, M. A., Pearce, E., Smith, K., and Lach, B. (2011) Suction-modified  
670 Bergstrom muscle biopsy technique: experience with 13,500 procedures. *Muscle Nerve*  
671 **43**, 717–725
- 672 30. Kato, H., Suzuki, K., Bannai, M., and Moore, D. R. (2016) Protein Requirements Are  
673 Elevated in Endurance Athletes after Exercise as Determined by the Indicator Amino  
674 Acid Oxidation Method. *PLoS One* **11**, e0157406
- 675 31. Markworth, J. F., Vella, L. D., Figueiredo, V. C., and Cameron-Smith, D. (2014)  
676 Ibuprofen treatment blunts early translational signaling responses in human skeletal  
677 muscle following resistance exercise. *J Appl Physiol* **117**, 20–28
- 678 32. Brook, M. S., Wilkinson, D. J., Mitchell, W. K., Lund, J. N., Phillips, B. E., Szewczyk, N.  
679 J., Greenhaff, P. L., Smith, K., and Atherton, P. J. (2016) Synchronous deficits in  
680 cumulative muscle protein synthesis and ribosomal biogenesis underlie age-related  
681 anabolic resistance to exercise in humans. *J. Physiol.* **594**, 7399–7417

- 682 33. Hodson, N., West, D. W. D., Philp, A., Burd, N. A., and Moore, D. R. (2019)  
683 MOLECULAR REGULATION OF HUMAN SKELETAL MUSCLE PROTEIN  
684 SYNTHESIS IN RESPONSE TO EXERCISE AND NUTRIENTS: A COMPASS FOR  
685 OVERCOMING AGE-RELATED ANABOLIC RESISTANCE. *Am. J. Physiol. Cell*  
686 *Physiol.*
- 687 34. You, J. S., McNally, R. M., Jacobs, B. L., Privett, R. E., Gundermann, D. M., Lin, K. H.,  
688 Steinert, N. D., Goodman, C. A., and Hornberger, T. A. (2018) The role of raptor in the  
689 mechanical load-induced regulation of mTOR signaling, protein synthesis, and skeletal  
690 muscle hypertrophy. *Faseb j* fj201801653RR
- 691 35. Hewitt, S. M., Baskin, D. G., Frevert, C. W., Stahl, W. L., and Rosa-Molinar, E. (2014)  
692 Controls for immunohistochemistry: the Histochemical Society's standards of practice for  
693 validation of immunohistochemical assays. *J. Histochem. Cytochem. Off. J. Histochem.*  
694 *Soc.* **62**, 693–697
- 695 36. Koopman, R., Pennings, B., Zorenc, A. H., and van Loon, L. J. (2007) Protein ingestion  
696 further augments S6K1 phosphorylation in skeletal muscle following resistance type  
697 exercise in males. *J Nutr* **137**, 1880–1886
- 698 37. Moberg, M., Apro, W., Ekblom, B., van Hall, G., Holmberg, H. C., and Blomstrand, E.  
699 (2016) Activation of mTORC1 by leucine is potentiated by branched-chain amino acids  
700 and even more so by essential amino acids following resistance exercise. *Am J Physiol*  
701 *Cell Physiol* **310**, C874-84
- 702 38. Apro, W., Moberg, M., Hamilton, D. L., Ekblom, B., Rooyackers, O., Holmberg, H. C.,  
703 and Blomstrand, E. (2015) Leucine does not affect mechanistic target of rapamycin  
704 complex 1 assembly but is required for maximal ribosomal protein s6 kinase 1 activity in  
705 human skeletal muscle following resistance exercise. *Faseb j*
- 706 39. Sancak, Y., Bar-Peled, L., Zoncu, R., Markhard, A. L., Nada, S., and Sabatini, D. M.  
707 (2010) Ragulator-Rag complex targets mTORC1 to the lysosomal surface and is necessary  
708 for its activation by amino acids. *Cell* **141**, 290–303
- 709 40. Abou Sawan, S., van Vliet, S., Parel, J. T., Beals, J. W., Mazzulla, M., West, D. W. D.,  
710 Philp, A., Li, Z., Paluska, S. A., Burd, N. A., and Moore, D. R. (2018) Translocation and  
711 protein complex co-localization of mTOR is associated with postprandial myofibrillar  
712 protein synthesis at rest and after endurance exercise. *Physiol Rep* **6**
- 713 41. Horne, Z. and Hesketh, J. (1990) Immunological localization of ribosomes in striated rat  
714 muscle. Evidence for myofibrillar association and ontological changes in the  
715 subsarcolemmal:myofibrillar distribution. *Biochem J* **268**, 231–236
- 716 42. Goodman, C. A., Kotecki, J. A., Jacobs, B. L., and Hornberger, T. A. (2012) Muscle fiber  
717 type-dependent differences in the regulation of protein synthesis. *PLoS One* **7**, e37890
- 718 43. D'Hulst, G., Palmer, A. S., Masschelein, E., Bar-Nur, O., and De Bock, K. (2019)  
719 Voluntary Resistance Running as a Model to Induce mTOR Activation in Mouse Skeletal  
720 Muscle. *Front. Physiol.* **10**, 1271
- 721 44. Koopman, R., Zorenc, A. H., Gransier, R. J., Cameron-Smith, D., and van Loon, L. J.  
722 (2006) Increase in S6K1 phosphorylation in human skeletal muscle following resistance  
723 exercise occurs mainly in type II muscle fibers. *Am J Physiol Endocrinol Metab* **290**,  
724 E1245-52
- 725 45. Goodman, C. A., Mabrey, D. M., Frey, J. W., Miu, M. H., Schmidt, E. K., Pierre, P., and  
726 Hornberger, T. A. (2011) Novel insights into the regulation of skeletal muscle protein  
727 synthesis as revealed by a new nonradioactive in vivo technique. *Faseb j* **25**, 1028–1039



- 728 46. Scarborough, E. A., Uchida, K., Vogel, M., Erlitzki, N., Iyer, M., Phyo, S. A., Bogush, A.,  
729 Kehat, I., and Prosser, B. L. (2021) Microtubules orchestrate local translation to enable  
730 cardiac growth. *Nat. Commun.* **12**, 1547
- 731 47. Morkin, E. (1970) Postnatal muscle fiber assembly: localization of newly synthesized  
732 myofibrillar proteins. *Science* **167**, 1499–1501
- 733 48. Arif, A., Jia, J., Willard, B., Li, X., and Fox, P. L. (2019) Multisite Phosphorylation of  
734 S6K1 Directs a Kinase Phospho-code that Determines Substrate Selection. *Mol. Cell* **73**,  
735 446-457.e6
- 736 49. Martin, T. D., Dennis, M. D., Gordon, B. S., Kimball, S. R., and Jefferson, L. S. (2014)  
737 mTORC1 and JNK coordinate phosphorylation of the p70S6K1 autoinhibitory domain in  
738 skeletal muscle following functional overloading. *Am. J. Physiol. Endocrinol. Metab.* **306**,  
739 E1397-405
- 740 50. Weng, Q. P., Kozlowski, M., Belham, C., Zhang, A., Comb, M. J., and Avruch, J. (1998)  
741 Regulation of the p70 S6 kinase by phosphorylation in vivo. Analysis using site-specific  
742 anti-phosphopeptide antibodies. *J. Biol. Chem.* **273**, 16621–16629
- 743 51. Edman, S., Soderlund, K., Moberg, M., Apro, W., and Blomstrand, E. (2019) mTORC1  
744 Signaling in Individual Human Muscle Fibers Following Resistance Exercise in  
745 Combination With Intake of Essential Amino Acids. *Front. Nutr.* **6**, 96
- 746 52. Koopman, R., Gleeson, B. G., Gijzen, A. P., Groen, B., Senden, J. M. G., Rennie, M. J.,  
747 and van Loon, L. J. C. (2011) Post-exercise protein synthesis rates are only marginally  
748 higher in type I compared with type II muscle fibres following resistance-type exercise.  
749 *Eur. J. Appl. Physiol.* **111**, 1871–1878
- 750 53. Mittendorfer, B., Andersen, J. L., Plomgaard, P., Saltin, B., Babraj, J. A., Smith, K., and  
751 Rennie, M. J. (2005) Protein synthesis rates in human muscles: neither anatomical  
752 location nor fibre-type composition are major determinants. *J. Physiol.* **563**, 203–211
- 753 54. Schwartz, M. A. and Ginsberg, M. H. (2002) Networks and crosstalk: integrin signalling  
754 spreads. *Nat. Cell Biol.* **4**, E65-8
- 755 55. Bloch, R. J. and Gonzalez-Serratos, H. (2003) Lateral force transmission across  
756 costameres in skeletal muscle. *Exerc. Sport Sci. Rev.* **31**, 73–78
- 757 56. Graham, Z. A., Gallagher, P. M., and Cardozo, C. P. (2015) Focal adhesion kinase and its  
758 role in skeletal muscle. *J. Muscle Res. Cell Motil.* **36**, 305–315
- 759 57. Turner, C. E. (1998) Molecules in focus Paxillin. *Int. J. Biochem. Cell Biol.* **30**, 955–959
- 760 58. Arnesen, S. M. and Lawson, M. A. (2006) Age-related changes in focal adhesions lead to  
761 altered cell behavior in tendon fibroblasts. *Mech. Ageing Dev.* **127**, 726–732
- 762 59. Porter, L. J., Holt, M. R., Soong, D., Shanahan, C. M., and Warren, D. T. (2016) Prelamin  
763 A Accumulation Attenuates Rac1 Activity and Increases the Intrinsic Migrational  
764 Persistence of Aged Vascular Smooth Muscle Cells. *Cells* **5**
- 765 60. Kumar, V., Selby, A., Rankin, D., Patel, R., Atherton, P., Hildebrandt, W., Williams, J.,  
766 Smith, K., Seynnes, O., Hiscock, N., and Rennie, M. J. (2009) Age-related differences in  
767 the dose-response relationship of muscle protein synthesis to resistance exercise in young  
768 and old men. *J Physiol* **587**, 211–217
- 769 61. Fry, C. S., Drummond, M. J., Glynn, E. L., Dickinson, J. M., Gundersmann, D. M.,  
770 Timmerman, K. L., Walker, D. K., Dhanani, S., Volpi, E., and Rasmussen, B. B. (2011)  
771 Aging impairs contraction-induced human skeletal muscle mTORC1 signaling and protein  
772 synthesis. *Skelet Muscle* **1**, 11
- 773

## Figure Legends

**Figure 1.** Validation of the p-RPS6<sup>Ser240/244</sup> immunofluorescent stain via Lambda protein phosphatase assay (LPP) (A) and secondary antibody (B) and primary antibody (C) omission stains. \*Significantly different from CON (p<0.001).

**Figure 2.** The effect of protein-carbohydrate beverage ingestion at rest (FED) or following resistance exercise (EXFED) on RPS6<sup>Ser240/244</sup> phosphorylation (A), total RPS6 protein content (B) and RPS6<sup>Ser240/244</sup> phosphorylation in relation to total protein content (C). Representative immunoblot images are shown in panel D. \*significantly different from PRE, #significantly different from 300,  $\delta$ significant difference between conditions,  $\psi$ significant condition effect (p<0.05). Data presented as Mean $\pm$ SD, n=7 per condition.

**Figure 3.** The effect of protein-carbohydrate beverage ingestion at rest (FED) or following resistance exercise (EXFED) on RPS6<sup>Ser240/244</sup> phosphorylation measured by immunofluorescence microscopy (A). Pearson's correlation coefficient analysis between immunoblot and immunofluorescent staining is also shown (B). Representative images of the p-RPS6<sup>Ser240/244</sup> stains are shown in (C), with p-RPS6<sup>Ser240/244</sup> alone and merged with dystrophin and DAPI provided. \*significantly different from PRE, #significantly different from 300,  $\delta$ significant difference between conditions at this timepoint (p<0.05). Data presented as Mean $\pm$ SD, n=7 per condition.

**Figure 4.** The effect of protein-carbohydrate beverage ingestion at rest (FED) or following resistance exercise (EXFED) on RPS6<sup>Ser240/244</sup> phosphorylation in central (A) and peripheral (B) regions of fibers. Peripheral-central ratio of p-RPS6<sup>Ser240/244</sup> staining in each condition is also shown (C). \*significantly different from PRE, #significantly different from 300,  $\delta$ significant difference between conditions (p<0.05). Data presented as Mean $\pm$ SD, n=7 per condition.

**Figure 5.** The effect of protein-carbohydrate beverage ingestion at rest (FED) or following resistance exercise (EXFED) on fiber type-specific RPS6<sup>Ser240/244</sup> phosphorylation presented as arbitrary units (A) or relative to PRE (B). Representative images of the 120 timepoint are shown in (C), with p-RPS6<sup>Ser240/244</sup> alone (green) and Myosin Heavy Chain 1 + dystrophin (red + blue) provided. I indicates type I fibers and II indicates type II fibers on representative images. \*significantly different from PRE, #significantly different from 300 (p<0.05). Data presented as Mean $\pm$ SD, n=7 per condition.

**Figure 6.** The effect of protein-carbohydrate beverage ingestion at rest (FED) or following resistance exercise (EXFED) on p-RPS6<sup>Ser240/244</sup> association with focal adhesion complexes assessed as p-RPS6<sup>Ser240/244</sup>-Paxillin colocalization (A) and p-RPS6<sup>Ser240/244</sup> staining intensity with paxillin-positive regions (B). Representative images of the 120 timepoint are shown in (C), with p-RPS6<sup>Ser240/244</sup> alone (green), paxillin alone (red) and p-RPS6<sup>Ser240/244</sup>, paxillin and WGA overlaid (Merge) provided. \*significantly different from PRE, #significantly different from 300 (p<0.05). Data presented as Mean $\pm$ SD, n=7 per condition.

**Figure 7.** The effect of protein-carbohydrate beverage ingestion at rest (FED) or following resistance exercise (EXFED) on mTOR translocation assessed by mTOR-WGA colocalization

(A), mTOR-Dystrophin colocalization (B) and peripheral-central ratio of mTOR staining (D). Pearson's correlation coefficient analysis between the mTOR-WGA and mTOR-Dystrophin colocalization is also shown (C). \*significantly different from PRE, #significantly different from 300,  $\delta$ significant effect of condition ( $p < 0.05$ ). Data presented as Mean $\pm$ SD, n=7 per condition.

**Table 1. Summary of Antibodies Used**

| Primary Antibody                                                                               | Source                          | Dilution | Secondary Antibody                             | Dilution |
|------------------------------------------------------------------------------------------------|---------------------------------|----------|------------------------------------------------|----------|
| Monoclonal anti-pRPS6 <sup>Ser240/244</sup> antibody with rabbit antigen, isotype IgG          | Cell Signaling Technology #5364 | 1:50     | Goat anti-rabbit IgG(H+L) Alexa@488            | 1:300    |
| Monoclonal anti-Dystrophin antibody with mouse antigen, isotype IgG2a                          | DSHB, MANDYS1 3B7               | 1:200    | Goat anti-mouse IgG(H+L) Alexa@594             | 1:300    |
| Monoclonal anti-MHC1 antibody with mouse antigen, isotype IgG $\gamma$ 1 kappa                 | DSHB, A4.951                    | Neat     | Goat anti-mouse IgG $\gamma$ 1 kappa Alexa@594 | 1:300    |
| Monoclonal anti-Paxillin antibody (Clone 349) with mouse antigen, isotype IgG $\gamma$ 1 kappa | Millipore, MAB3060              | 1:500    | Goat anti-mouse IgG $\gamma$ 1 kappa Alexa@594 | 1:300    |
| Monoclonal anti- mTOR antibody with mouse antigen, isotype IgG $\gamma$ 1 kappa                | Millipore, 05-1592              | 1:200    | Goat anti-mouse IgG $\gamma$ 1 kappa Alexa@594 | 1:300    |
| DAPI (4',6-Diamidino-2-Phenylindole, Dihydrochloride)                                          | Invitrogen, D1306               | 1:10,000 | N/A                                            | N/A      |
| Wheat Germ Agglutinin-350                                                                      | Invitrogen, W11263              | 1:20     | Alexa Fluor® 350 Conjugated                    | N/A      |

Figure 1

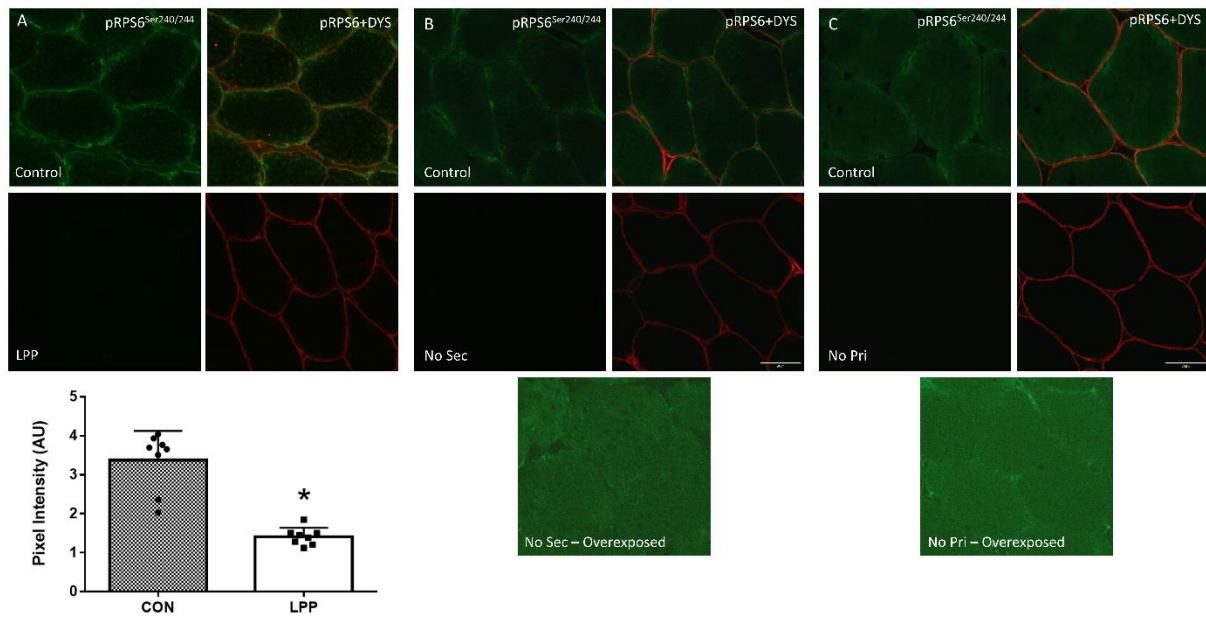



**Figure 3**

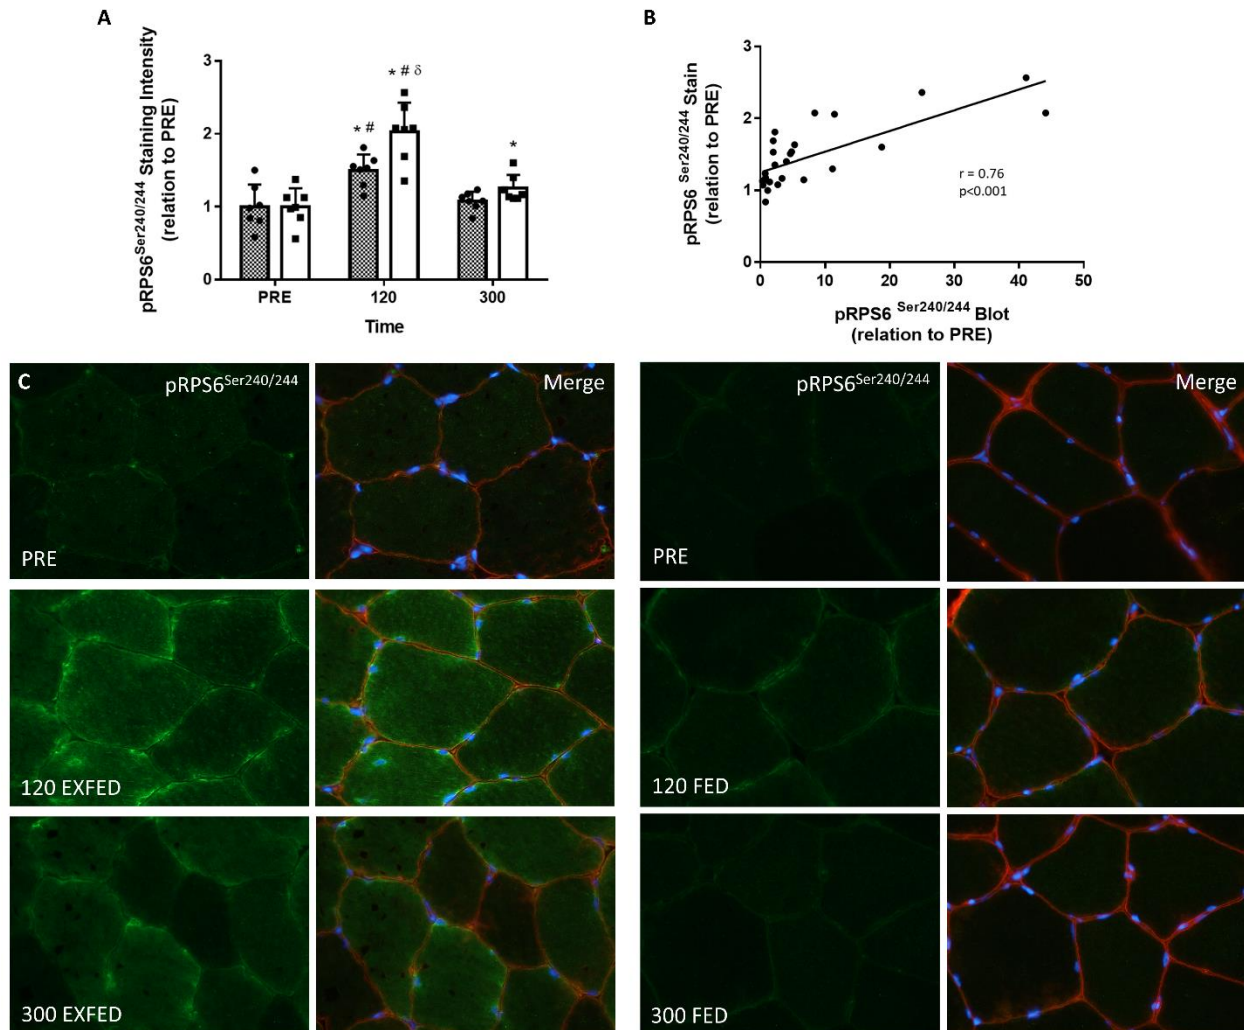

**Figure 4**

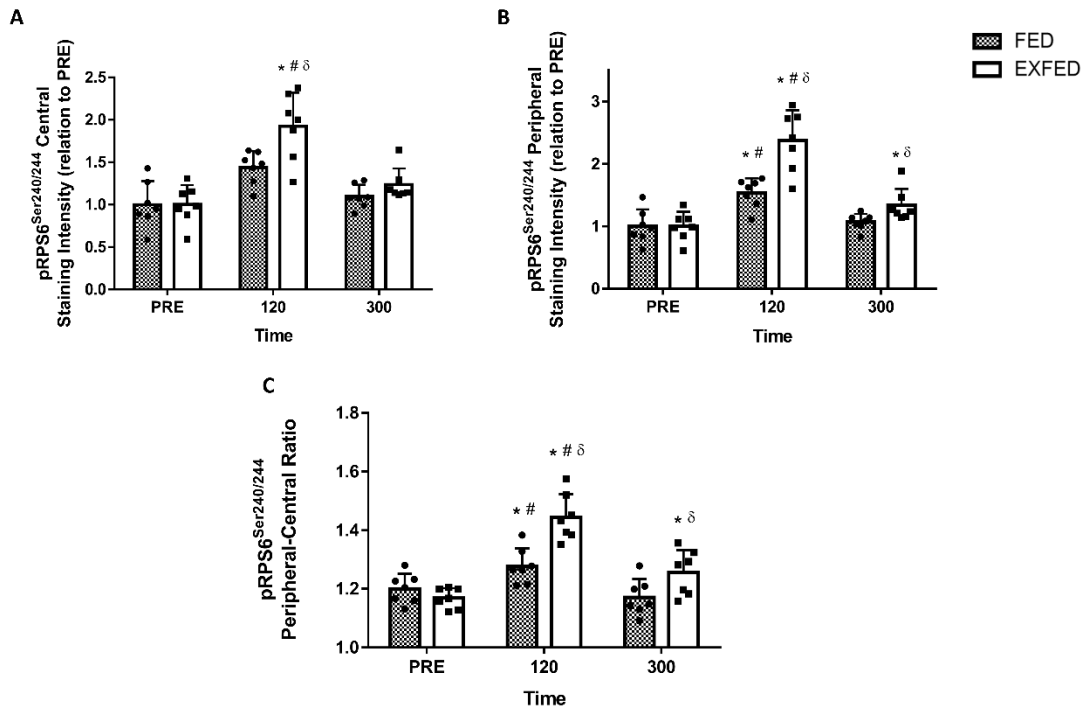



**Figure 5**

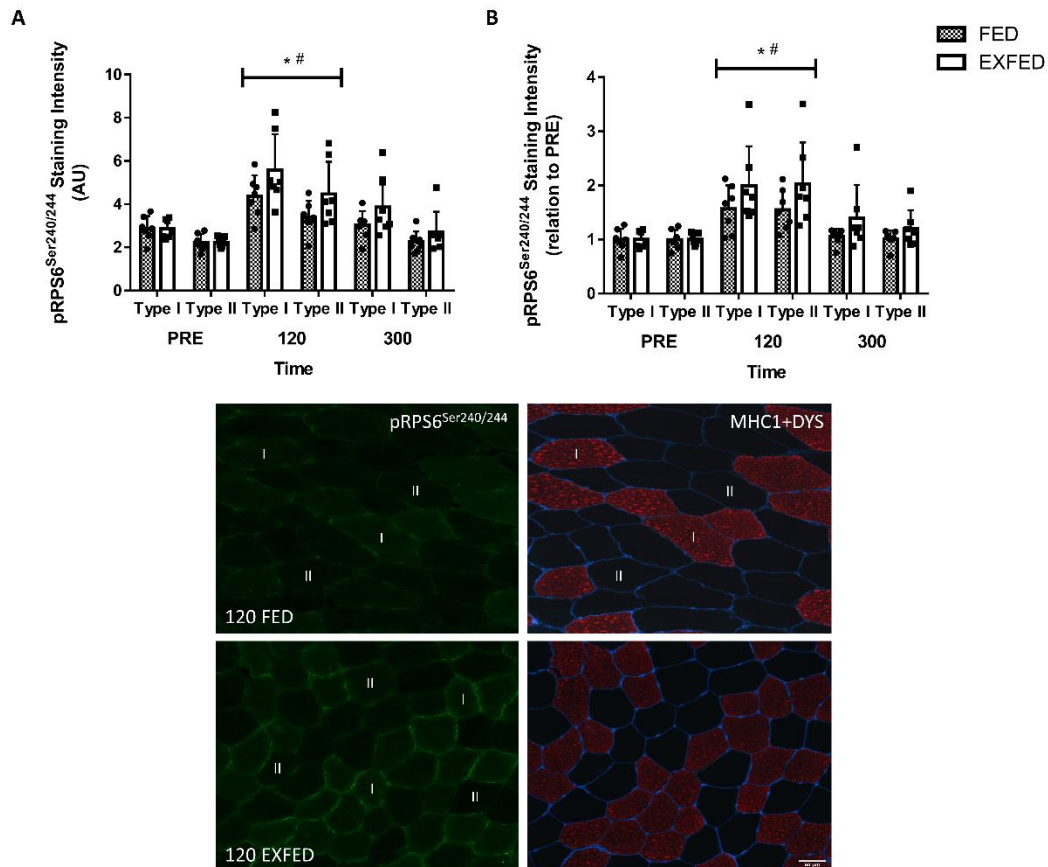



**Figure 6**

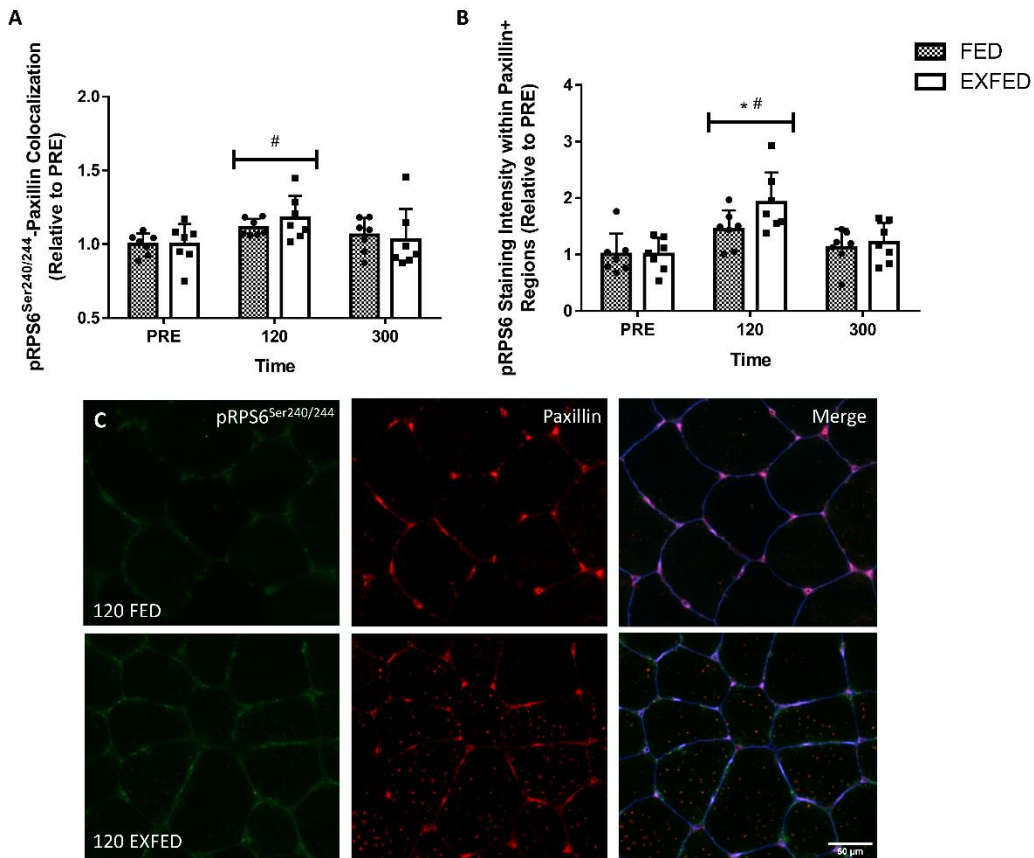

Figure 7

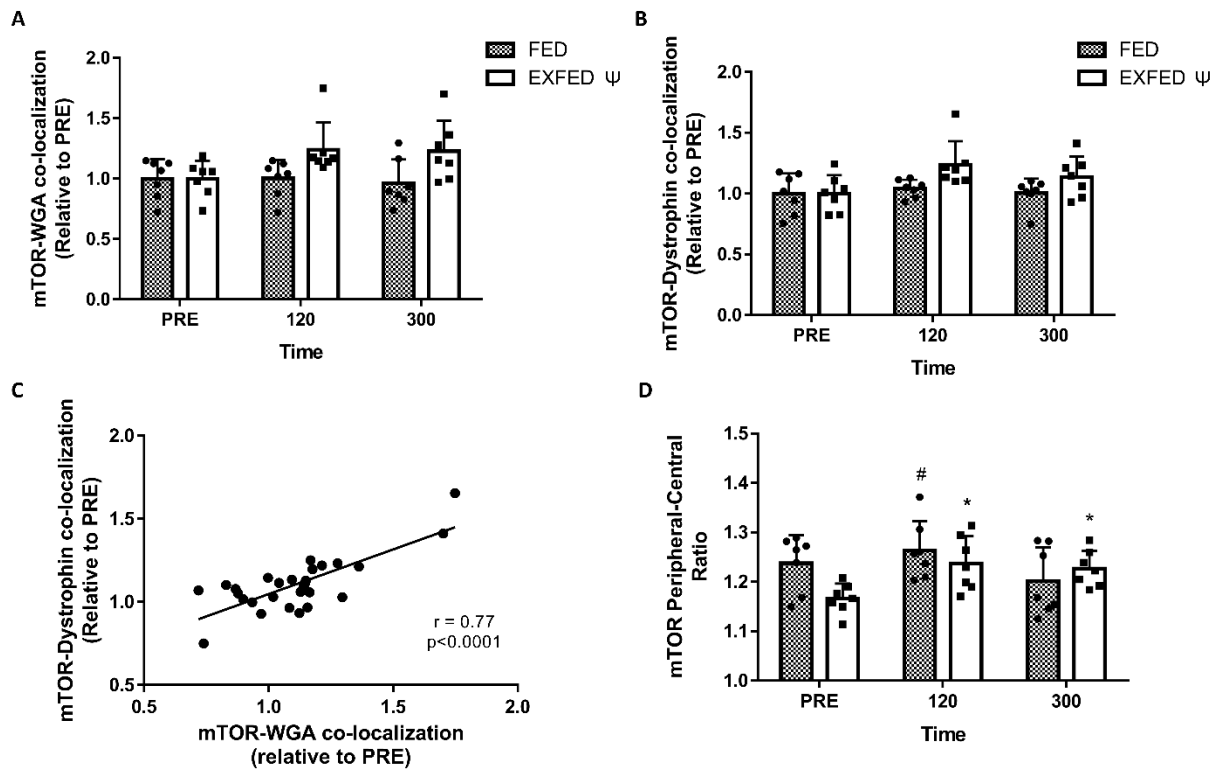

Source: https://www.biorxiv.org/content/10.1101/2021.06.22.449494v1.full.pdf
